# Supplementary material
Source: Springer Nature journal article supplement (https://www.springermedizin.de/resource/supplementary/12955_2006_277_MOESM1_ESM.pdf/9560044)

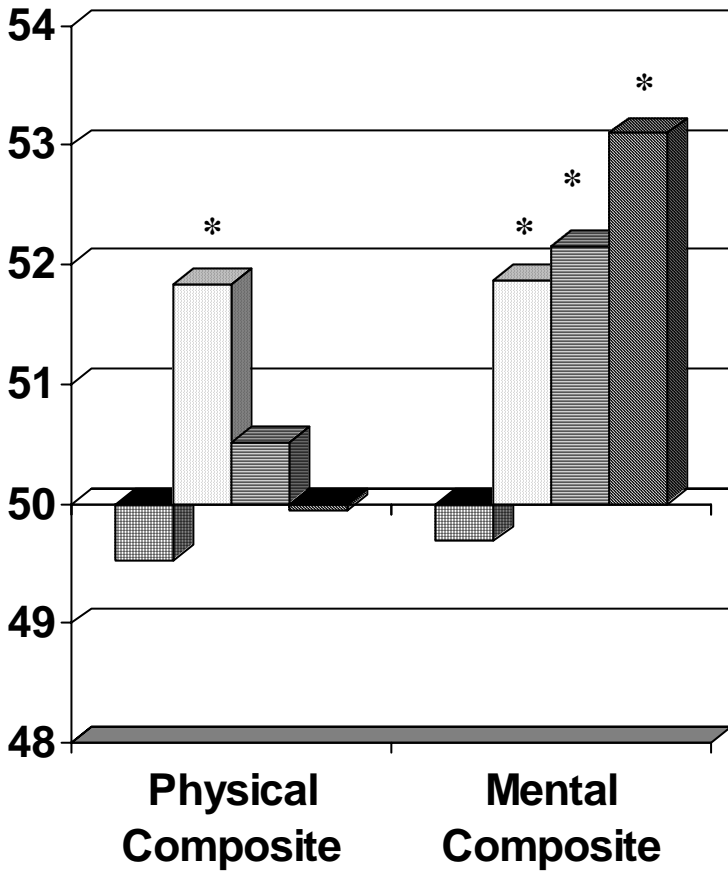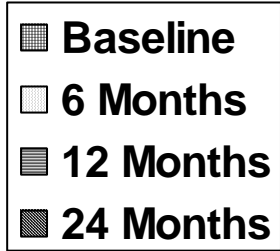

Supplement: MOESM1 [file 9560044]
